# Supplementary material for: Notch3 Activation Promotes Invasive Glioma Formation in a Tissue Site-Specific Manner
Source: Oxford University Press journal article supplement (doi:10.1158/0008-5472.can-10-0690), 2011-01-19
Supplement: 00085472can100690-sup-sfigleg.pdf [file 00085472can100690-sup-sfigleg.pdf]

## Supplementary Data Figure Legends

Supplemental Figure 1. Amino Acid Sequence of the NICD1/NICD3 Chimeric Constructs. NICD1/NICD3 chimeric constructs are of human origin. The chimeric cDNAs ( $\Delta$ N1113,  $\Delta$ N1133, and  $\Delta$ N1333) were created by using standard PCR amplification and ligation protocols and were verified by DNA sequencing. Shown are the amino acid sequences of the truncated intracellular domain of Notch1 ( $\Delta$ NICD1) and Notch3 ( $\Delta$ NICD3), full length NICD3, and the chimeric constructs. Notch3 sequences are highlighted in gray to distinguish them from Notch1 sequences. The different domains of NICD are color coded: RAM domain (red), Ankryin repeats (blue), and a proximal portion of the transactivation domain (TAD $\Delta$ ) (green).
